# Supplementary material
Source: PubMed Central journal article supplement (PMC3747722)
Supplement: chest_143_5_1226_ds01.pdf [file chest_143_5_1226_ds01.pdf]

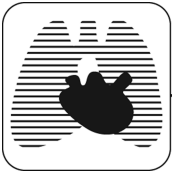

## **Moderate Glucose Control Is Associated With Increased Mortality Compared With Tight Glucose Control in Critically Ill Patients Without Diabetes**

*Michael J. Lanspa, MD; Eliotte L. Hirshberg, MD; Gregory D. Phillips, BA; John Holmen, PhD; Gregory Stoddard, MS; and James Orme, MD, FCCP*

*Online supplements are not copyedited prior to posting.*

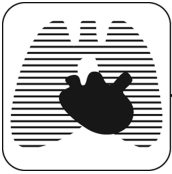

**e-Figure 1.** Histogram of diabetic and non-diabetics by patient's mean blood glucose

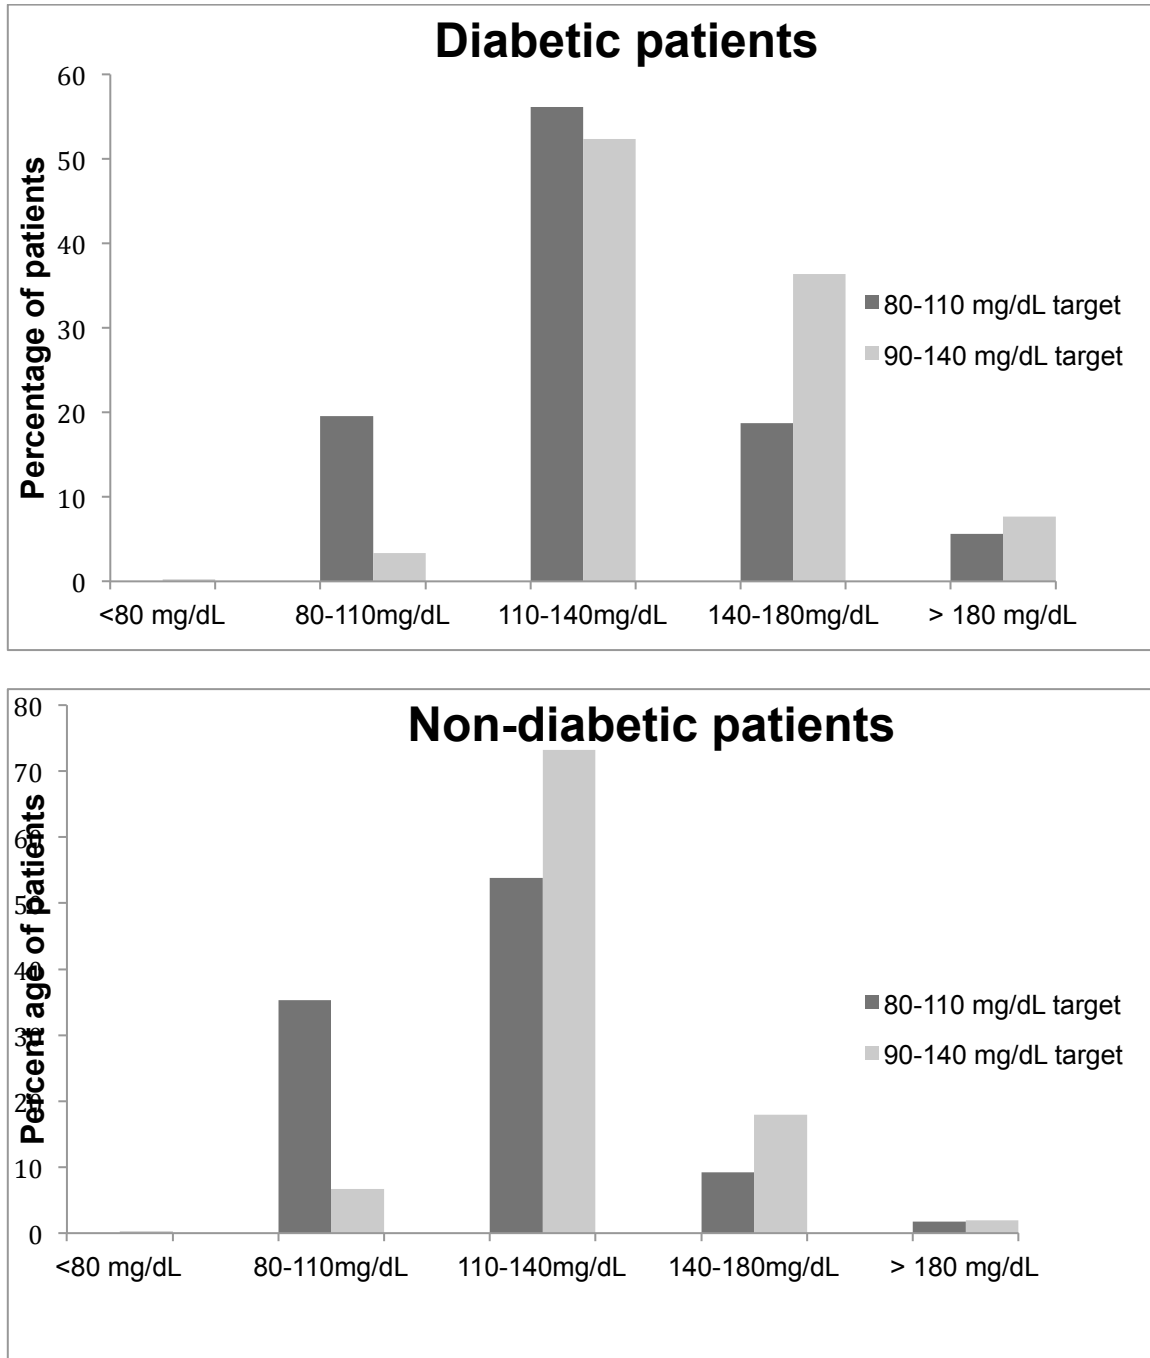

*Online supplements are not copyedited prior to posting.*



**e-Figure 2.** Percent mortality by patient's mean blood glucose

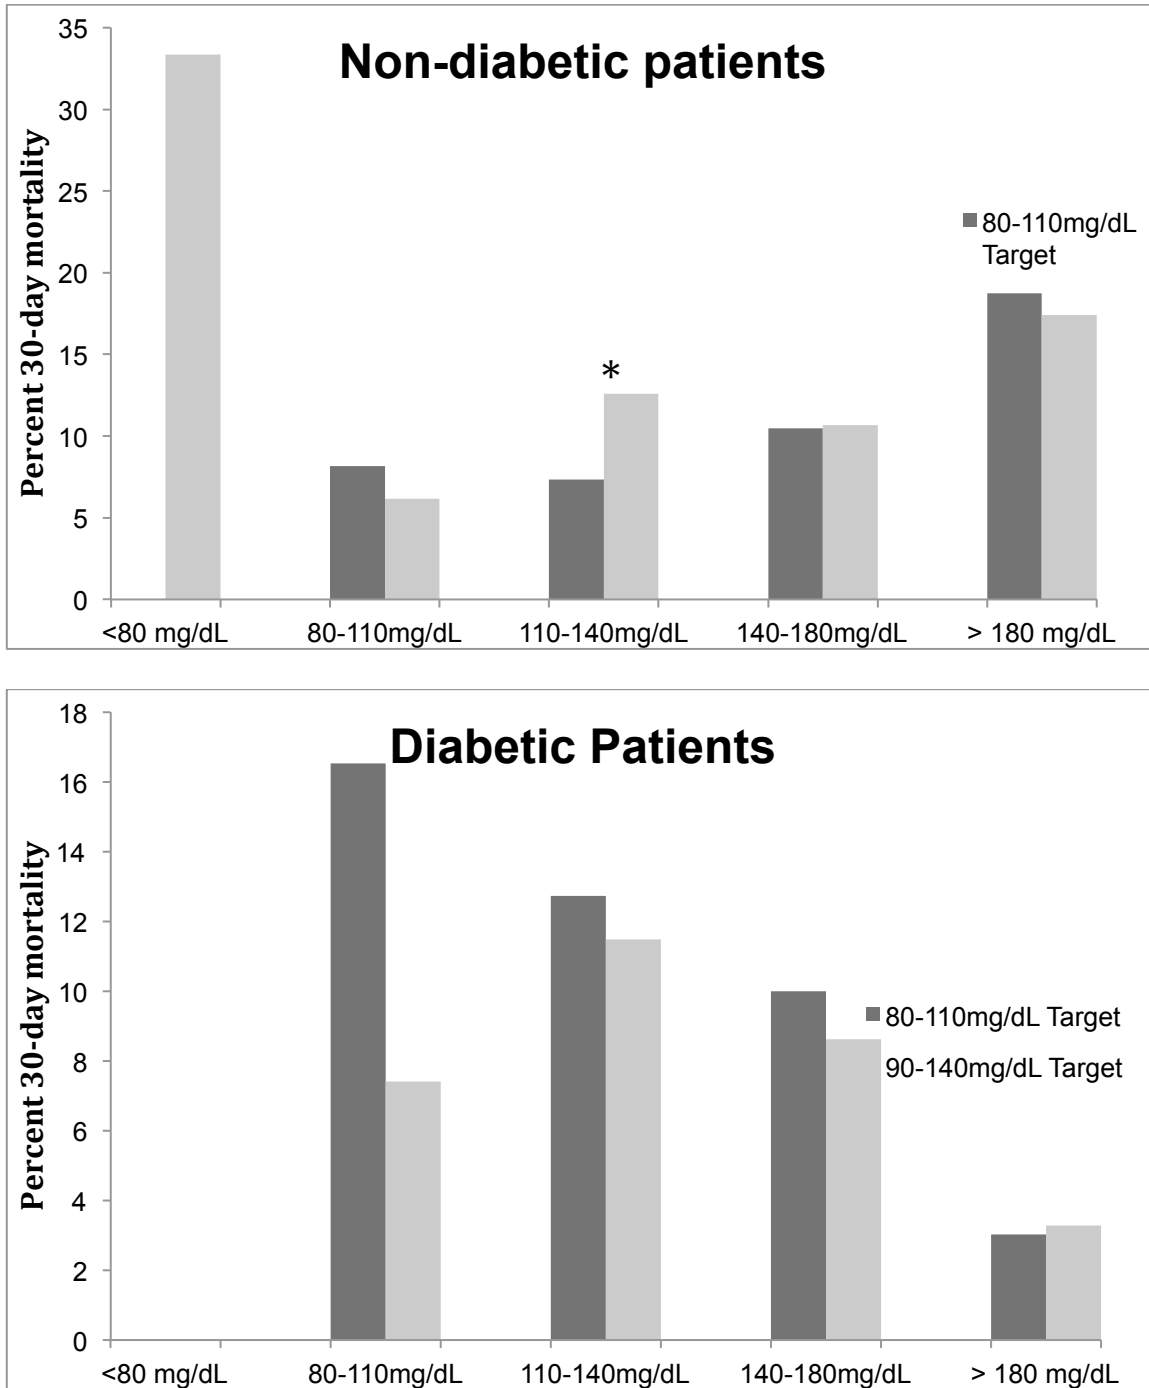

*Online supplements are not copyedited prior to posting.*
